# Supplementary material for: Wetland management strategies lead to tradeoffs in ecological structure and function
Source: Oxford University Press journal article supplement (doi:10.1525/elementa.253), 2017-01-01
Supplement: elementa-5-253-s1.xlsx [file elementa-5-253-s1.xlsx]

## Sheet: SupplementalTable
OTU	Cluster	IndVal	Prob	Domain	Phylum	Class	Order	Family	Genus
Otu000005	1	0.193845	0.001	Bacteria	Acidobacteria	Acidobacteria_Gp6	Acidobacteria_Gp6_order_incertae_sedis	Acidobacteria_Gp6_family_incertae_sedis	Gp6
Otu000008	1	0.179362	0.021	Bacteria	Proteobacteria	Alphaproteobacteria	Rhizobiales	Hyphomicrobiaceae	Hyphomicrobiaceae_unclassified
Otu000014	1	0.19487	0.003	Bacteria	Acidobacteria	Acidobacteria_Gp6	Acidobacteria_Gp6_order_incertae_sedis	Acidobacteria_Gp6_family_incertae_sedis	Gp6
Otu000020	1	0.209471	0.001	Bacteria	Acidobacteria	Acidobacteria_Gp6	Acidobacteria_Gp6_order_incertae_sedis	Acidobacteria_Gp6_family_incertae_sedis	Gp6
Otu000021	1	0.193639	0.008	Bacteria	Verrucomicrobia	Subdivision3	Subdivision3_order_incertae_sedis	Subdivision3_family_incertae_sedis	3_genus_incertae_sedis
Otu000037	1	0.190988	0.008	Bacteria	Proteobacteria	Alphaproteobacteria	Rhizobiales	Phyllobacteriaceae	Mesorhizobium
Otu000047	1	0.225691	0.028	Bacteria	Proteobacteria	Gammaproteobacteria	Pseudomonadales	Pseudomonadaceae	Pseudomonas
Otu000049	1	0.200467	0.012	Bacteria	Bacteria_unclassified	Bacteria_unclassified	Bacteria_unclassified	Bacteria_unclassified	Bacteria_unclassified
Otu000057	1	0.212563	0.006	Bacteria	Bacteroidetes	Sphingobacteria	Sphingobacteriales	Saprospiraceae	Lewinella
Otu000070	1	0.237224	0.006	Bacteria	Bacteria_unclassified	Bacteria_unclassified	Bacteria_unclassified	Bacteria_unclassified	Bacteria_unclassified
Otu000089	1	0.210539	0.001	Bacteria	Acidobacteria	Acidobacteria_Gp5	Acidobacteria_Gp5_order_incertae_sedis	Acidobacteria_Gp5_family_incertae_sedis	Gp5
Otu000090	1	0.211844	0.001	Bacteria	Bacteria_unclassified	Bacteria_unclassified	Bacteria_unclassified	Bacteria_unclassified	Bacteria_unclassified
Otu000092	1	0.214148	0.001	Bacteria	Verrucomicrobia	Subdivision3	Subdivision3_order_incertae_sedis	Subdivision3_family_incertae_sedis	3_genus_incertae_sedis
Otu000097	1	0.206542	0.003	Bacteria	Verrucomicrobia	Spartobacteria	Spartobacteria_order_incertae_sedis	Spartobacteria_family_incertae_sedis	Spartobacteria_genera_incertae_sedis
Otu000100	1	0.193123	0.049	Bacteria	Proteobacteria	Proteobacteria_unclassified	Proteobacteria_unclassified	Proteobacteria_unclassified	Proteobacteria_unclassified
Otu000104	1	0.214848	0.004	Bacteria	Bacteria_unclassified	Bacteria_unclassified	Bacteria_unclassified	Bacteria_unclassified	Bacteria_unclassified
Otu000105	1	0.198567	0.04	Bacteria	Acidobacteria	Acidobacteria_Gp4	Acidobacteria_Gp4_order_incertae_sedis	Acidobacteria_Gp4_family_incertae_sedis	Gp4
Otu000133	1	0.216071	0.005	Bacteria	Acidobacteria	Acidobacteria_Gp6	Acidobacteria_Gp6_order_incertae_sedis	Acidobacteria_Gp6_family_incertae_sedis	Gp6
Otu000170	1	0.210506	0.046	Bacteria	Bacteria_unclassified	Bacteria_unclassified	Bacteria_unclassified	Bacteria_unclassified	Bacteria_unclassified
Otu000173	1	0.249847	0.002	Bacteria	Bacteroidetes	Flavobacteria	Flavobacteriales	Flavobacteriaceae	Flavobacterium
Otu000178	1	0.222769	0.018	Bacteria	Proteobacteria	Deltaproteobacteria	Desulfobacterales	Desulfobacteraceae	Desulfococcus
Otu000180	1	0.24102	0.001	Bacteria	Planctomycetes	Planctomycetacia	Planctomycetales	Planctomycetaceae	Planctomycetaceae_unclassified
Otu000192	1	0.213438	0.021	Bacteria	Verrucomicrobia	Verrucomicrobia_unclassified	Verrucomicrobia_unclassified	Verrucomicrobia_unclassified	Verrucomicrobia_unclassified
Otu000199	1	0.243851	0.003	Bacteria	Proteobacteria	Gammaproteobacteria	Pseudomonadales	Pseudomonadaceae	Pseudomonas
Otu000204	1	0.20864	0.001	Bacteria	Bacteria_unclassified	Bacteria_unclassified	Bacteria_unclassified	Bacteria_unclassified	Bacteria_unclassified
Otu000244	1	0.218704	0.006	Bacteria	Proteobacteria	Gammaproteobacteria	Gammaproteobacteria_unclassified	Gammaproteobacteria_unclassified	Gammaproteobacteria_unclassified
Otu000258	1	0.199191	0.041	Bacteria	Actinobacteria	Actinobacteria	Acidimicrobiales	Acidimicrobiaceae	Ilumatobacter
Otu000260	1	0.204649	0.027	Bacteria	Bacteria_unclassified	Bacteria_unclassified	Bacteria_unclassified	Bacteria_unclassified	Bacteria_unclassified
Otu000283	1	0.21792	0.038	Bacteria	Acidobacteria	Acidobacteria_Gp17	Acidobacteria_Gp17_order_incertae_sedis	Acidobacteria_Gp17_family_incertae_sedis	Gp17
Otu000296	1	0.224894	0.005	Bacteria	Acidobacteria	Acidobacteria_Gp22	Acidobacteria_Gp22_order_incertae_sedis	Acidobacteria_Gp22_family_incertae_sedis	Gp22
Otu000030	2	0.220875	0.003	Bacteria	Proteobacteria	Alphaproteobacteria	Rhizobiales	Methylobacteriaceae	Microvirga
Otu000044	2	0.19199	0.007	Bacteria	Proteobacteria	Alphaproteobacteria	Rhizobiales	Hyphomicrobiaceae	Hyphomicrobium
Otu000052	2	0.192216	0.05	Bacteria	Verrucomicrobia	Spartobacteria	Spartobacteria_order_incertae_sedis	Spartobacteria_family_incertae_sedis	Spartobacteria_genera_incertae_sedis
Otu000056	2	0.211884	0.005	Bacteria	Acidobacteria	Acidobacteria_Gp6	Acidobacteria_Gp6_order_incertae_sedis	Acidobacteria_Gp6_family_incertae_sedis	Gp6
Otu000059	2	0.193815	0.014	Bacteria	Bacteria_unclassified	Bacteria_unclassified	Bacteria_unclassified	Bacteria_unclassified	Bacteria_unclassified
Otu000093	2	0.189023	0.046	Bacteria	Firmicutes	Bacilli	Bacillales	Pasteuriaceae	Pasteuria
Otu000140	2	0.205255	0.008	Bacteria	Bacteria_unclassified	Bacteria_unclassified	Bacteria_unclassified	Bacteria_unclassified	Bacteria_unclassified
Otu000143	2	0.198161	0.047	Bacteria	Proteobacteria	Alphaproteobacteria	Alphaproteobacteria_unclassified	Alphaproteobacteria_unclassified	Alphaproteobacteria_unclassified
Otu000144	2	0.203527	0.023	Bacteria	Chloroflexi	Chloroflexi_unclassified	Chloroflexi_unclassified	Chloroflexi_unclassified	Chloroflexi_unclassified
Otu000177	2	0.208225	0.043	Bacteria	Verrucomicrobia	Subdivision3	Subdivision3_order_incertae_sedis	Subdivision3_family_incertae_sedis	3_genus_incertae_sedis
Otu000189	2	0.220587	0.002	Bacteria	Bacteria_unclassified	Bacteria_unclassified	Bacteria_unclassified	Bacteria_unclassified	Bacteria_unclassified
Otu000205	2	0.207221	0.024	Bacteria	Acidobacteria	Acidobacteria_Gp4	Acidobacteria_Gp4_order_incertae_sedis	Acidobacteria_Gp4_family_incertae_sedis	Gp4
Otu000207	2	0.215089	0.008	Bacteria	Proteobacteria	Deltaproteobacteria	Deltaproteobacteria_unclassified	Deltaproteobacteria_unclassified	Deltaproteobacteria_unclassified
Otu000211	2	0.210669	0.033	Bacteria	Chloroflexi	Chloroflexi_unclassified	Chloroflexi_unclassified	Chloroflexi_unclassified	Chloroflexi_unclassified
Otu000040	3	0.195066	0.008	Bacteria	Bacteria_unclassified	Bacteria_unclassified	Bacteria_unclassified	Bacteria_unclassified	Bacteria_unclassified
Otu000058	3	0.238193	0.001	Bacteria	Proteobacteria	Deltaproteobacteria	Myxococcales	Cystobacteraceae	Anaeromyxobacter
Otu000078	3	0.196529	0.003	Bacteria	Proteobacteria	Deltaproteobacteria	Myxococcales	Myxococcales_unclassified	Myxococcales_unclassified
Otu000186	3	0.23355	0.037	Bacteria	Proteobacteria	Proteobacteria_unclassified	Proteobacteria_unclassified	Proteobacteria_unclassified	Proteobacteria_unclassified
Otu000193	3	0.290996	0.017	Bacteria	Proteobacteria	Proteobacteria_unclassified	Proteobacteria_unclassified	Proteobacteria_unclassified	Proteobacteria_unclassified
Otu000220	3	0.198559	0.031	Bacteria	Proteobacteria	Betaproteobacteria	Betaproteobacteria_unclassified	Betaproteobacteria_unclassified	Betaproteobacteria_unclassified
Otu000017	4	0.19323	0.035	Bacteria	Proteobacteria	Betaproteobacteria	Betaproteobacteria_unclassified	Betaproteobacteria_unclassified	Betaproteobacteria_unclassified
Otu000066	4	0.19176	0.039	Bacteria	Proteobacteria	Alphaproteobacteria	Rhodospirillales	Acetobacteraceae	Stella
Otu000067	4	0.229502	0.005	Bacteria	Acidobacteria	Acidobacteria_Gp4	Acidobacteria_Gp4_order_incertae_sedis	Acidobacteria_Gp4_family_incertae_sedis	Gp4
Otu000096	4	0.21779	0.004	Bacteria	Verrucomicrobia	Spartobacteria	Spartobacteria_order_incertae_sedis	Spartobacteria_family_incertae_sedis	Spartobacteria_genera_incertae_sedis
Otu000110	4	0.191393	0.037	Bacteria	Proteobacteria	Betaproteobacteria	Burkholderiales	Burkholderiales_unclassified	Burkholderiales_unclassified
Otu000119	4	0.259546	0.048	Bacteria	Proteobacteria	Gammaproteobacteria	Gammaproteobacteria_unclassified	Gammaproteobacteria_unclassified	Gammaproteobacteria_unclassified
Otu000122	4	0.204883	0.035	Bacteria	Acidobacteria	Acidobacteria_Gp4	Acidobacteria_Gp4_order_incertae_sedis	Acidobacteria_Gp4_family_incertae_sedis	Gp4
Otu000125	4	0.238911	0.001	Bacteria	Proteobacteria	Alphaproteobacteria	Sphingomonadales	Sphingomonadaceae	Sphingomonas
Otu000128	4	0.207992	0.021	Bacteria	Firmicutes	Bacilli	Bacillales	Planococcaceae	Sporosarcina
Otu000130	4	0.197714	0.016	Bacteria	Firmicutes	Firmicutes_unclassified	Firmicutes_unclassified	Firmicutes_unclassified	Firmicutes_unclassified
Otu000181	4	0.218121	0.008	Bacteria	Bacteria_unclassified	Bacteria_unclassified	Bacteria_unclassified	Bacteria_unclassified	Bacteria_unclassified
Otu000188	4	0.210963	0.024	Bacteria	Proteobacteria	Deltaproteobacteria	Deltaproteobacteria_unclassified	Deltaproteobacteria_unclassified	Deltaproteobacteria_unclassified
Otu000212	4	0.227197	0.001	Bacteria	Acidobacteria	Acidobacteria_Gp3	Acidobacteria_Gp3_order_incertae_sedis	Acidobacteria_Gp3_family_incertae_sedis	Gp3
Otu000221	4	0.229788	0.002	Bacteria	Bacteria_unclassified	Bacteria_unclassified	Bacteria_unclassified	Bacteria_unclassified	Bacteria_unclassified
Otu000230	4	0.199872	0.028	Bacteria	Verrucomicrobia	Subdivision3	Subdivision3_order_incertae_sedis	Subdivision3_family_incertae_sedis	3_genus_incertae_sedis
Otu000266	4	0.217772	0.02	Bacteria	Acidobacteria	Acidobacteria_Gp25	Acidobacteria_Gp25_order_incertae_sedis	Acidobacteria_Gp25_family_incertae_sedis	Gp25
Otu000016	5	0.229479	0.001	Bacteria	Proteobacteria	Deltaproteobacteria	Desulfuromonadales	Desulfuromonadaceae	Desulfuromonas
Otu000029	5	0.194627	0.025	Bacteria	Actinobacteria	Actinobacteria	Actinomycetales	Micrococcaceae	Arthrobacter
Otu000041	5	0.194359	0.04	Bacteria	Proteobacteria	Alphaproteobacteria	Sphingomonadales	Sphingomonadaceae	Sphingomonadaceae_unclassified
Otu000046	5	0.193194	0.04	Bacteria	Bacteria_unclassified	Bacteria_unclassified	Bacteria_unclassified	Bacteria_unclassified	Bacteria_unclassified
Otu000061	5	0.215402	0.001	Bacteria	Proteobacteria	Deltaproteobacteria	Desulfuromonadales	Geobacteraceae	Geobacter
Otu000074	5	0.194688	0.005	Bacteria	Bacteria_unclassified	Bacteria_unclassified	Bacteria_unclassified	Bacteria_unclassified	Bacteria_unclassified
Otu000080	5	0.184346	0.039	Bacteria	Proteobacteria	Betaproteobacteria	Rhodocyclales	Rhodocyclaceae	Sterolibacterium
Otu000084	5	0.199201	0.005	Bacteria	Actinobacteria	Actinobacteria	Actinomycetales	Microbacteriaceae	Microbacteriaceae_unclassified
Otu000120	5	0.221867	0.002	Bacteria	Bacteroidetes	Sphingobacteria	Sphingobacteriales	Cytophagaceae	Adhaeribacter
Otu000129	5	0.210075	0.002	Bacteria	Bacteria_unclassified	Bacteria_unclassified	Bacteria_unclassified	Bacteria_unclassified	Bacteria_unclassified
Otu000138	5	0.201943	0.013	Bacteria	Proteobacteria	Proteobacteria_unclassified	Proteobacteria_unclassified	Proteobacteria_unclassified	Proteobacteria_unclassified
Otu000142	5	0.224559	0.004	Bacteria	Bacteroidetes	Sphingobacteria	Sphingobacteriales	Sphingobacteriales_unclassified	Sphingobacteriales_unclassified
Otu000155	5	0.225913	0.008	Bacteria	Proteobacteria	Deltaproteobacteria	Desulfuromonadales	Desulfuromonadaceae	Desulfuromonas
Otu000201	5	0.257573	0.001	Bacteria	Proteobacteria	Deltaproteobacteria	Desulfuromonadales	Desulfuromonadaceae	Desulfuromonas
Otu000206	5	0.220423	0.04	Bacteria	Acidobacteria	Acidobacteria_Gp22	Acidobacteria_Gp22_order_incertae_sedis	Acidobacteria_Gp22_family_incertae_sedis	Gp22
Otu000237	5	0.265627	0.021	Bacteria	Proteobacteria	Gammaproteobacteria	Aeromonadales	Aeromonadaceae	Aeromonas
Otu000242	5	0.223933	0.001	Bacteria	Planctomycetes	Planctomycetacia	Planctomycetales	Planctomycetaceae	Planctomycetaceae_unclassified
Otu000268	5	0.247339	0.001	Bacteria	Bacteria_unclassified	Bacteria_unclassified	Bacteria_unclassified	Bacteria_unclassified	Bacteria_unclassified
Otu000274	5	0.243538	0.007	Bacteria	Proteobacteria	Deltaproteobacteria	Desulfuromonadales	Geobacteraceae	Geobacter
Otu000279	5	0.263055	0.001	Bacteria	Bacteroidetes	Flavobacteria	Flavobacteriales	Flavobacteriales_unclassified	Flavobacteriales_unclassified
Otu000031	6	0.192659	0.017	Bacteria	Actinobacteria	Actinobacteria	Actinobacteria_unclassified	Actinobacteria_unclassified	Actinobacteria_unclassified
Otu000055	6	0.213037	0.002	Bacteria	Acidobacteria	Acidobacteria_Gp10	Acidobacteria_Gp10_order_incertae_sedis	Acidobacteria_Gp10_family_incertae_sedis	Gp10
Otu000082	6	0.215689	0.006	Bacteria	Proteobacteria	Alphaproteobacteria	Sphingomonadales	Sphingomonadales_unclassified	Sphingomonadales_unclassified
Otu000087	6	0.208106	0.003	Bacteria	Proteobacteria	Betaproteobacteria	Betaproteobacteria_unclassified	Betaproteobacteria_unclassified	Betaproteobacteria_unclassified
Otu000111	6	0.203438	0.019	Bacteria	Proteobacteria	Deltaproteobacteria	Desulfobacterales	Desulfobulbaceae	Desulfocapsa
Otu000117	6	0.225968	0.01	Bacteria	Acidobacteria	Acidobacteria_Gp7	Acidobacteria_Gp7_order_incertae_sedis	Acidobacteria_Gp7_family_incertae_sedis	Gp7
Otu000183	6	0.209305	0.017	Bacteria	Proteobacteria	Alphaproteobacteria	Rhizobiales	Rhizobiales_unclassified	Rhizobiales_unclassified
Otu000200	6	0.288073	0.011	Bacteria	Proteobacteria	Betaproteobacteria	Betaproteobacteria_unclassified	Betaproteobacteria_unclassified	Betaproteobacteria_unclassified
Otu000224	6	0.260727	0.035	Bacteria	Proteobacteria	Betaproteobacteria	Betaproteobacteria_unclassified	Betaproteobacteria_unclassified	Betaproteobacteria_unclassified
Otu000232	6	0.255049	0.007	Bacteria	Proteobacteria	Proteobacteria_unclassified	Proteobacteria_unclassified	Proteobacteria_unclassified	Proteobacteria_unclassified
Otu000261	6	0.222699	0.048	Bacteria	Gemmatimonadetes	Gemmatimonadetes	Gemmatimonadales	Gemmatimonadaceae	Gemmatimonas
Otu000275	6	0.233161	0.017	Bacteria	Proteobacteria	Proteobacteria_unclassified	Proteobacteria_unclassified	Proteobacteria_unclassified	Proteobacteria_unclassified
